# Supplementary material for: Hole dynamic acceleration over CdSO nanoparticles for high-efficiency solar hydrogen production with urea photolysis
Source: Royal Society of Chemistry journal article supplement (doi:10.1039/c9ta08357j), 2019-01-01
Supplement: c9ta08357j1.pdf [file c9ta08357j1.pdf]

## **Electronic supplementary information**

### **Hole dynamic acceleration over CdSO nanoparticles for high-efficiency solar hydrogen production with urea photolysis**

Fengting Luo,<sup>a,b</sup> Wen Qiao,<sup>a</sup> Huichao He,<sup>c</sup> Xiaoyong Xu,<sup>\*,a,b</sup> Jingguo Hu,<sup>\*,b</sup> Yong Zhou<sup>\*,d</sup> and Dunhui Wang,<sup>\*,a,d</sup>

---

<sup>a</sup>College of Electronics and Information, Hangzhou Dianzi University, Hangzhou 310018, China. E-mail: xxy@yzu.edu.cn and wangdh@nju.edu.cn

<sup>b</sup>College of Physics Science and Technology, Yangzhou University, Yangzhou 225002, China. E-mail: jghu@yzu.edu.cn

<sup>c</sup>State Key Laboratory of Environmental Friendly Energy Materials, Southwest University of Science and Technology, Mianyang 621010, China. E-mail: hehuichao@swust.edu.cn

<sup>d</sup>School of Physics, Nanjing University, Nanjing 210093, China. E-mail: zhoyong1999@nju.edu.cn

| <b>Sections</b>                                                                                        | <b>Page</b> |
|--------------------------------------------------------------------------------------------------------|-------------|
| Calculation method for depletion layer width                                                           | S3          |
| Calculation method for apparent quantum yield (AQY)                                                    | S4          |
| XRD pattern                                                                                            | S5          |
| FFT and SAED spectra                                                                                   | S6          |
| EDS spectrum                                                                                           | S7          |
| FT-IR spectra controlled experiments                                                                   | S8          |
| Raman spectra                                                                                          | S9          |
| FT-IR                                                                                                  | spectra     |
| S10                                                                                                    |             |
| EDS analysis                                                                                           | S11         |
| XPS spectra                                                                                            | S12         |
| Additional microstructure characterizations                                                            | S13         |
| Tauc plots converted from absorption spectra                                                           | S14         |
| Time dependent $V_{oc}$ curves                                                                         | S15         |
| Time dependent photocurrent response curves                                                            | S16         |
| Bias voltage-dependent SPV spectra                                                                     | S17         |
| Comparison of H <sub>2</sub> -evolution activities for dose optimum                                    | S18         |
| H <sub>2</sub> evolution and AQE under monochromatic light irradiation                                 | S19         |
| Comparison of H <sub>2</sub> -evolution activities with sacrificial agents                             | S20         |
| Microstructure characterizations after stability testing                                               | S21         |
| H <sub>2</sub> -evolution stability in pure water                                                      | S22         |
| Mott–Schottky plot                                                                                     | S23         |
| Digital photographs and H <sub>2</sub> -evolution activities for different CdS <sub>x</sub> O products | S24         |
| Comparison of various advanced photocatalysts                                                          | S25         |

**Note S1. Calculation method for depletion layer width**

The diffusion lengths of electron and hole are two important parameters for evaluating the charge transport property in semiconductors. The charge separation mechanism depends on the relative magnitude between crystal size and depletion layer width ( $W$ ).<sup>1</sup> Thus the  $W$  in CdS<sub>x</sub>O sample was estimated according to the following equation<sup>2</sup>

$$W = \sqrt{\frac{2\varepsilon_0\varepsilon(V - V_F)}{eN_d}} \quad (\text{E1})$$

where  $\varepsilon_0$  is the vacuum dielectric constant,  $\varepsilon$  is the relative dielectric constant ( $\sim 5.4$  for CdS),<sup>3</sup>  $e$  is the electron charge ( $1.6 \times 10^{-19}$  C),  $V_F$ ,  $N_d$  are the flat potential and the carrier concentration, which are taken as  $-0.18$  V vs. RHE and  $1.18 \times 10^{25} \text{ m}^{-3}$  according to the Mott-Schottky data (Supplementary Fig. 19). The estimated  $W$  at ca.  $6.2$  nm is close to the mean grain size obtained from XRD and HR-TEM results (Supplementary Fig. 1 and Fig. 1c), meaning the absence of space charge field with the essentially flat energy bands in nanograins. In addition, the grains exceed the quantum-confined space defined by the Bohr exciton radius ( $R_B \sim 3$  nm).<sup>3</sup> Thus the charge separation is driven mainly by free diffusion in small grains, enabling the surface-reaching propensities for both types of charge carriers.

## Note S2. Calculation method for apparent quantum yield (AQY)

The AQY values were calculated by the following equation:<sup>4</sup>

$$\begin{aligned}\text{AQY [\%]} &= \frac{\text{number of reacted electrons}}{\text{number of incident photons}} \times 100\% \\ &= \frac{\text{number of evolved H}_2 \text{ molecules} \times 2}{\text{number of incident photons}} \times 100\% \\ &= \frac{M_{\text{H}_2} \times N_{\text{A}} \times 2 \times h \times c}{I_{\text{i}} \times S \times t \times \lambda} \times 100\%\end{aligned}\quad (\text{E2})$$

where  $M_{\text{H}_2}$  is the mole number of evolved  $\text{H}_2$ ,  $N_{\text{A}}$ ,  $h$  are the Avogadro's and Planck's constants,  $c$ ,  $\lambda$ ,  $t$ ,  $S$  and  $I_{\text{i}}$  are the wave speed, wavelength, time, area, and intensity of light irradiation, respectively.  $I_{\text{i}}$  was determined by FZ-A spectroradiometer (Perfectlight, Beijing) and  $S$  was calibrated to be  $10 \text{ cm}^2$ .

**Table S1.** Various parameters for AQY calculation.

| Wavelength (nm) | Intensity (mW cm <sup>-2</sup> ) | H <sub>2</sub> amount (μmol h <sup>-1</sup> ) |
|-----------------|----------------------------------|-----------------------------------------------|
| 400 (±5 nm)     | 2                                | 4.31                                          |
| 420 (±5 nm)     | 1.5                              | 2.27                                          |

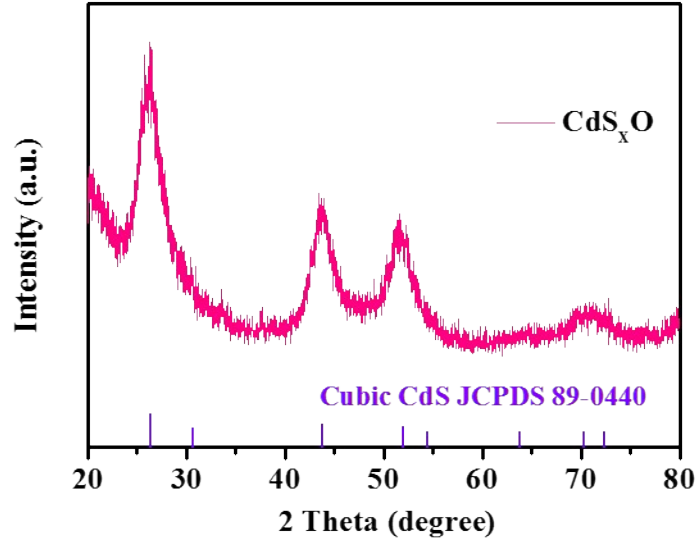

**Fig. S1** XRD pattern of as-synthesized  $\text{CdS}_x\text{O}$  NPs.

The XRD pattern of as-synthesized  $\text{CdS}_x\text{O}$  NPs can be indexed to cubic-phase CdS (JCPDS Card No. 89-0440), and their mean size is estimated using Debye-Scherrer equation as follows:<sup>5</sup>

$$D = 0.89\lambda / \beta \cos \theta_B, \quad (\text{E3})$$

where  $\lambda$  is the x-ray wavelength (0.154 nm),  $\beta$  is the peak width at half maximum and  $\theta_B$  is the Bragg diffraction angle. Based on overriding (111) peak, the average crystallite size is estimated at approximately 6.5 nm, which is consistent with their HR-TEM observation.

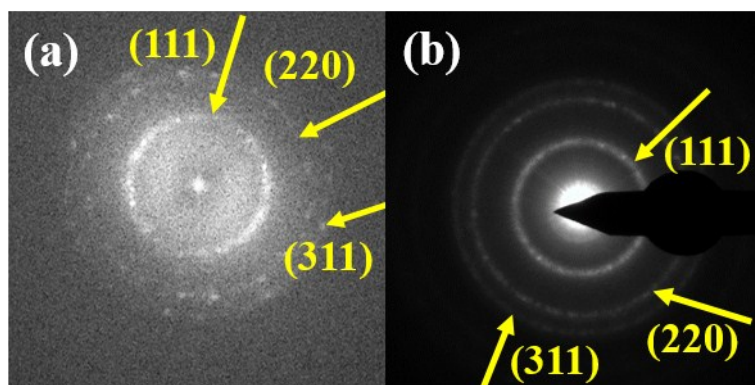

**Fig. S2** (a) FFT and (b) SAED patterns of as-synthesized CdS<sub>x</sub>O NPs.

Along with XRD and HR-TEM results, the SAED and FFT patterns confirm cubic-phase Cd-S crystallinity in CdS<sub>x</sub>O NPs.

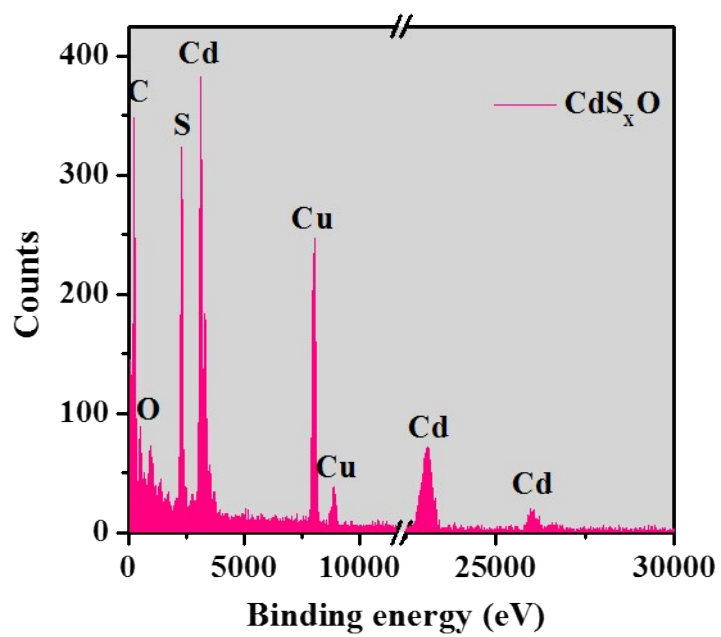

**Fig. S3** EDX spectrum of as-synthesized CdS<sub>x</sub>O NPs.

The EDX analysis reveals the composition of Cd, S, and O elements in CdS<sub>x</sub>O NPs, besides Cu element from the TEM test bracket.

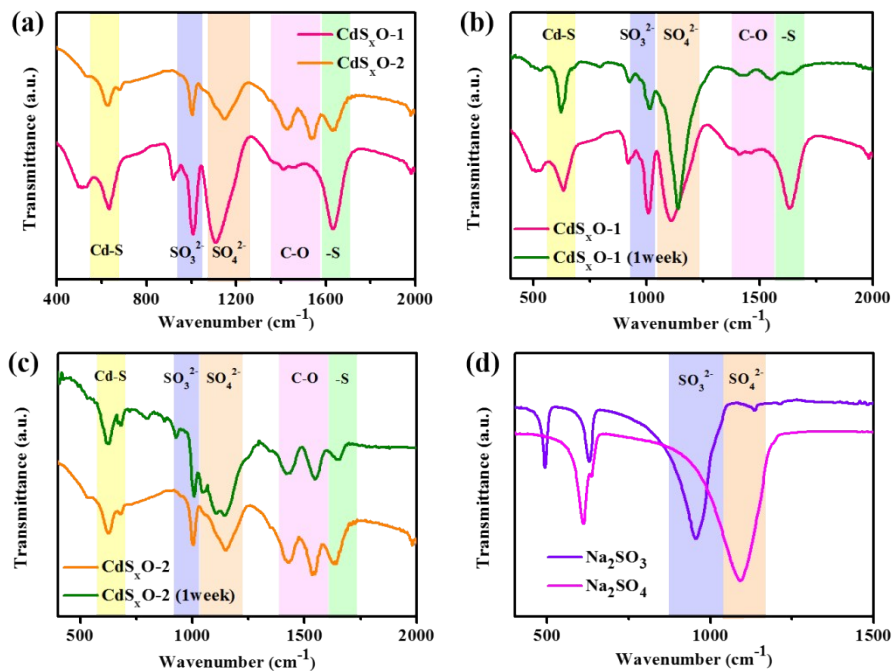

**Fig. S4** (a-c) FT-IR spectra of  $\text{CdS}_x\text{O}-1$  and  $\text{CdS}_x\text{O}-2$  with different contents of sulfurous groups before and after roasted at  $80^\circ\text{C}$  in air for 1 week. (d) FT-IR spectra of  $\text{Na}_2\text{SO}_3$  and  $\text{Na}_2\text{SO}_4$  for identifying characteristic peaks of  $\text{SO}_3^{2-}$  and  $\text{SO}_4^{2-}$  groups.

We regulated the atom ratio of Cd to S sources in the reaction mixture to obtain a series of  $\text{CdS}_x\text{O}$  samples with different contents of sulfurous groups samples. Two typical representatives synthesized at Cd : S ratios of 1 : 910 and 1 : 1 were labeled  $\text{CdS}_x\text{O}-1$  and  $\text{CdS}_x\text{O}-2$ , respectively, and their surface components before and after roasted at  $80^\circ\text{C}$  in air for 1 week were probed via the FT-IR spectroscopy. It can be seen that the  $\text{CdS}_x\text{O}-1$  has much more surface sulfurous groups than that of  $\text{CdS}_x\text{O}-2$ ; moreover those underoxidized  $-\text{S}$  and  $\text{SO}_3^{2-}$  molecules would occur oxidation transformation to  $\text{SO}_4^{2-}$  molecules with roasting time in air. The FT-IR spectra of  $\text{Na}_2\text{SO}_3$  and  $\text{Na}_2\text{SO}_4$  can assist to identify the characteristic peaks of  $\text{SO}_3^{2-}$  and  $\text{SO}_4^{2-}$  groups.



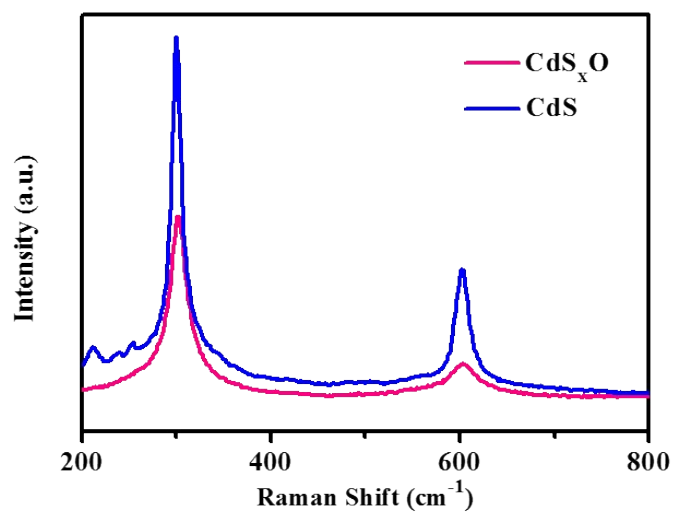

**Fig. S5** Raman spectra of  $\text{CdS}_x\text{O}$  and pure CdS.

The Raman spectra show two typical peaks at 299 and 600  $\text{cm}^{-1}$  of cubic-phase CdS, but the peak intensities of  $\text{CdS}_x\text{O}$  sample are much lower than that of pure CdS sample probably due to the shielding effect of massive surface groups.

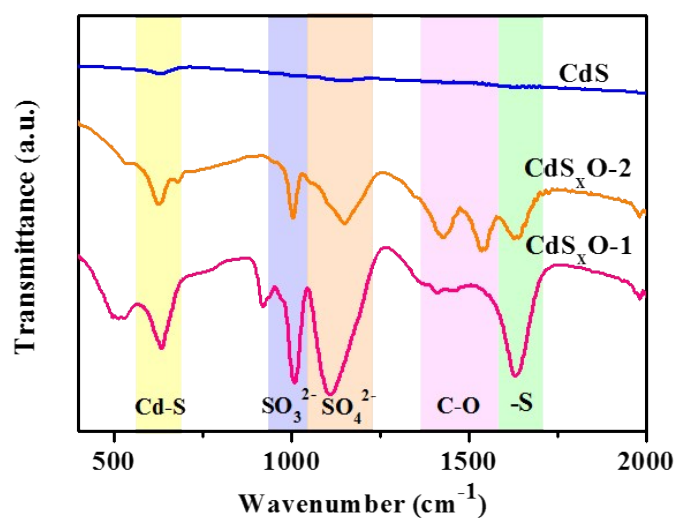

**Fig. S6** FT-IR spectra of  $\text{CdS}_x\text{O-1}$  and  $\text{CdS}_x\text{O-2}$  and annealed CdS samples.

The  $\text{CdS}_x\text{O-2}$  sample synthesized in the absence of sulfur-rich environment displays an obvious decline in sulfurous groups compared with  $\text{CdS}_x\text{O-1}$  sample, and moreover the annealed CdS sample almost disappears all FT-IR signals of surface groups due to the removal of sulfurous groups by annealing at 550 °C.

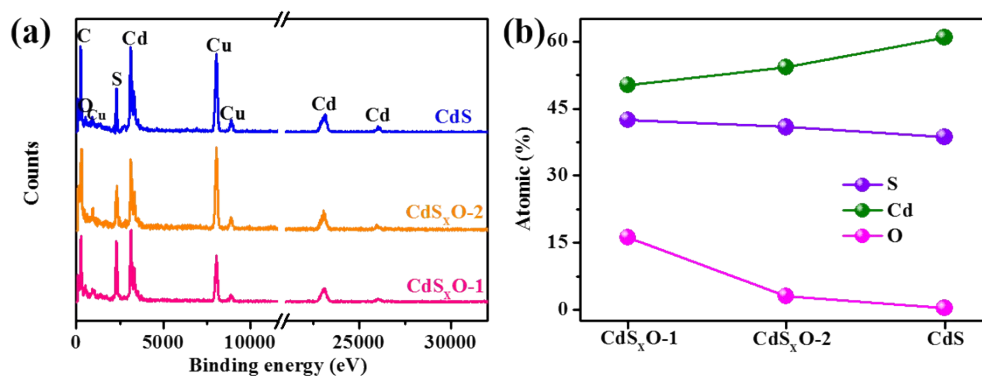

**Fig. S7** (a) EDS spectra and (b) corresponding elemental proportions of CdS<sub>x</sub>O-1, CdS<sub>x</sub>O-2 and annealed CdS samples.

Although it is difficult to determine the exact element proportions in samples since the EDS spectral responsiveness of different elements is different. However, the comparison for element proportions of different samples can provide qualitative insights into change in element composition. Here, the EDS analyses show the maximum proportions of S and O elements and the minimum one of Cd element appear in CdS<sub>x</sub>O-1 sample, indicating the surface occupation of sulfurous groups resulted from the sulfur-rich environment.

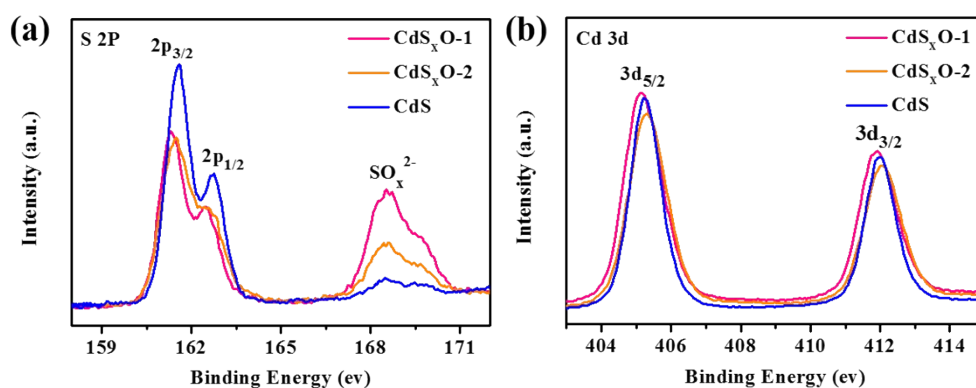

**Fig. S8** (a) S 2p and (b) Cd 3d XPS spectra of CdS<sub>x</sub>O-1, CdS<sub>x</sub>O-2 and annealed CdS samples.

The XPS spectra exhibit the characteristic peaks of S 2p and Cd 3d in the Cd-S coordination for all samples, but contrast to pure CdS sample, two CdS<sub>x</sub>O samples especially emerge an obviously asymmetric peak near 169 eV, referring to SO<sub>3</sub><sup>2-</sup>/SO<sub>4</sub><sup>2-</sup> molecules, which provides an evidence for the coupling SO<sub>x</sub><sup>2-</sup> groups.

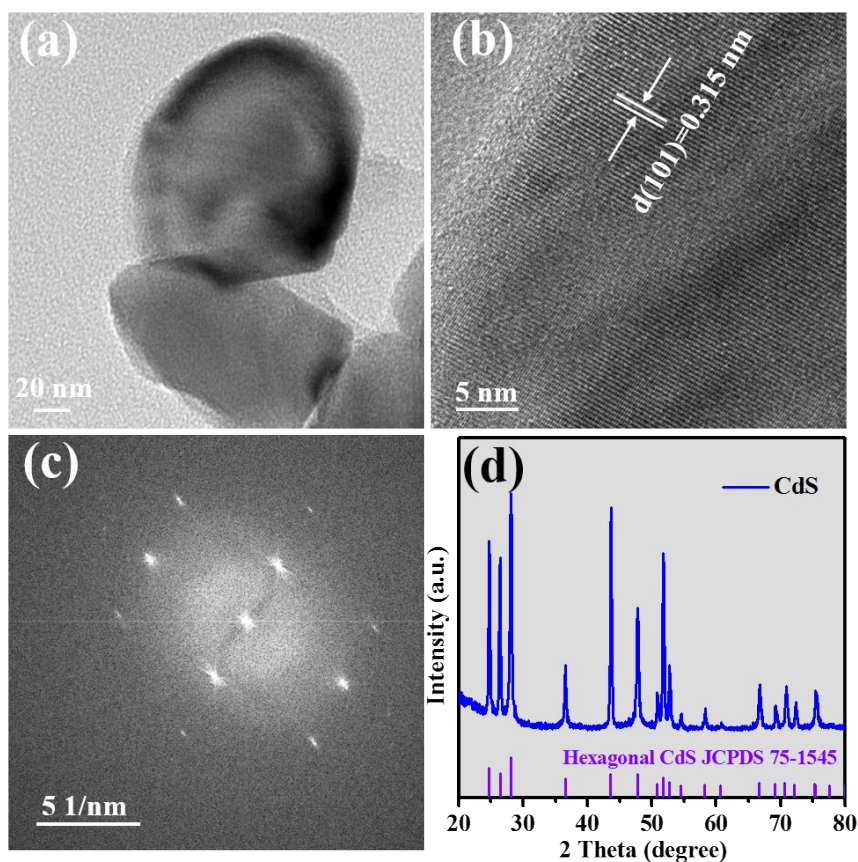

**Fig. S9** (a) TEM image, (b) HR-TEM image, (c) FFT and (d) XRD patterns of annealed CdS samples.

During annealing recrystallization, the  $\text{CdS}_x\text{O}$  NPs transform into the larger CdS particles ( $\sim 125$  nm) with removal of surface sulfurous groups. The XRD, HR-TEM, and corresponding FFT characterizations together identify the well-defined hexagonal-phase CdS crystallization. Moreover, the mean particle size estimated by Scherrer equation ( $D = 0.89\lambda / \beta \cos \theta_B$ ) is around 130 nm, which accords with the TEM observation.

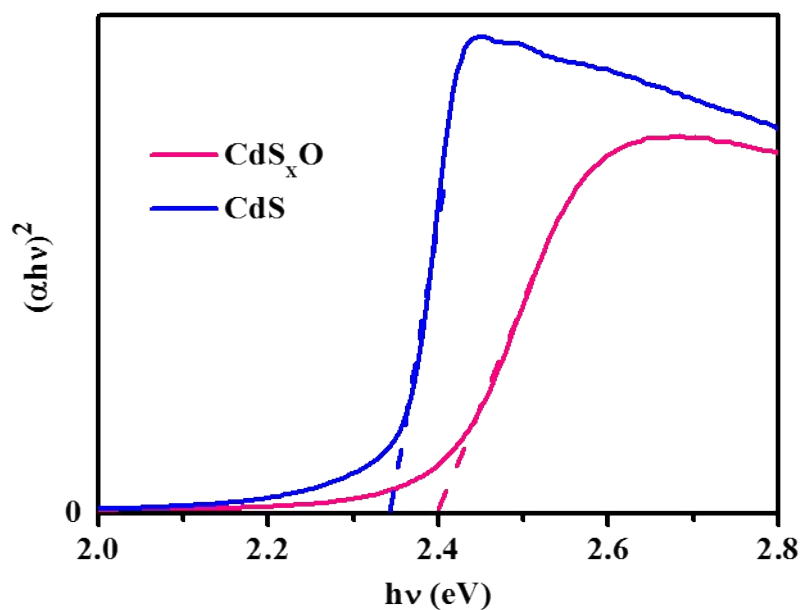

**Fig. S10** Tauc plots converted from the absorption spectra of CdS<sub>x</sub>O and CdS.

The bandgap of CdS<sub>x</sub>O is estimated to be about 2.4 eV using UV-vis absorption spectrum, which is slightly larger than the bandgap of annealed CdS, probably due to its composition of smaller CdS crystal grains with quantum size effect in CdS<sub>x</sub>O sample.

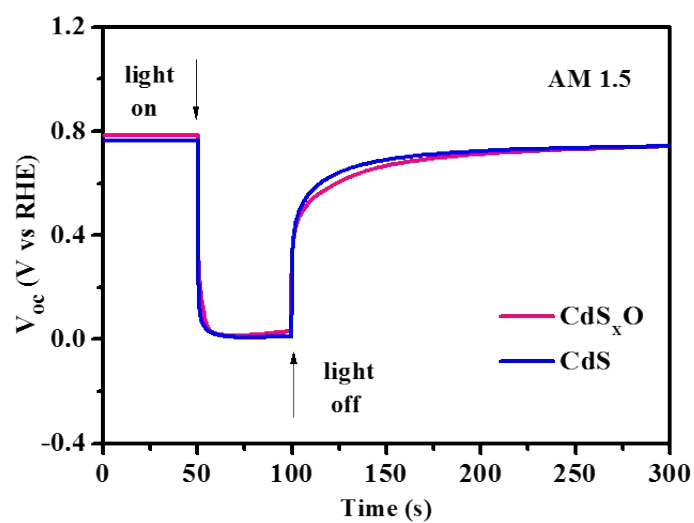

**Fig. S11** Time dependence of  $V_{oc}$  with ON/OFF switched light irradiation for  $CdS_xO$  and  $CdS$ .

Upon illumination termination, an evidently slower  $V_{oc}$  decay rate is found for  $CdS_xO$  sample, reflecting the delaying kinetic of charge recombination in  $CdS_xO$  relative to  $CdS$ .

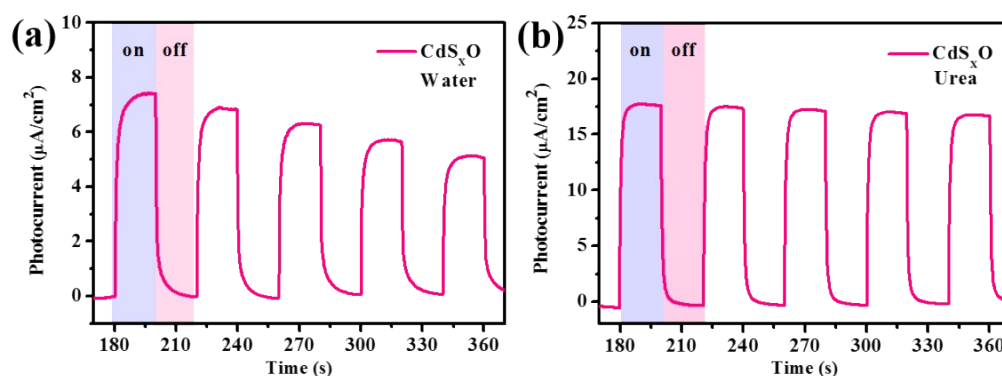

**Fig. S12** Time-dependent photocurrents for CdS<sub>x</sub>O in (a) pure water and (b) urea solution with ON/OFF switched light irradiation.

The time-dependent photocurrent of CdS<sub>x</sub>O in pure water presents the decaying response signals, which corresponds to the disassembly of sulfurous groups with hole capture agglomeration. However, introducing UOR with low thermodynamic potential as the ultimate destination for photogenerated holes can make the surface sulfurous groups durable mediators for hole transfer, enabling the robust photocurrent response in CdS<sub>x</sub>O.



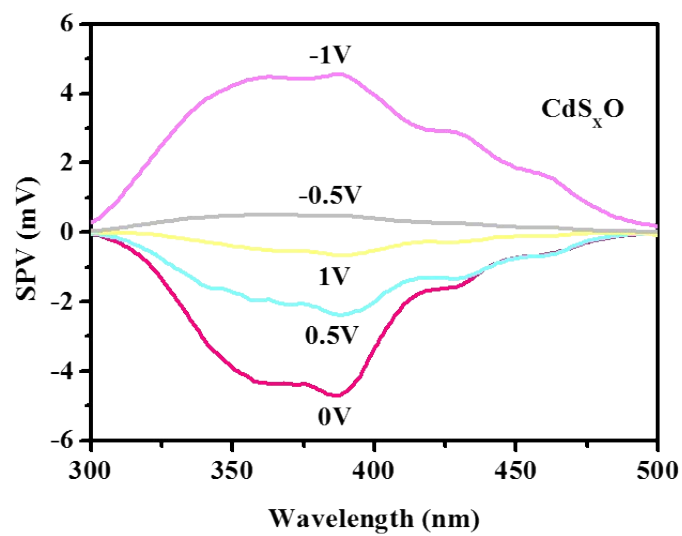

**Fig. S13** Bias voltage-dependent SPV spectra for  $\text{CdS}_x\text{O}$ .

The bias voltage-dependent SPV spectra show the abnormal change of SPV response intensity with the forward bias increasing, which can be associated with the disassembly of surface sulfurous groups upon hole capture agglomeration.

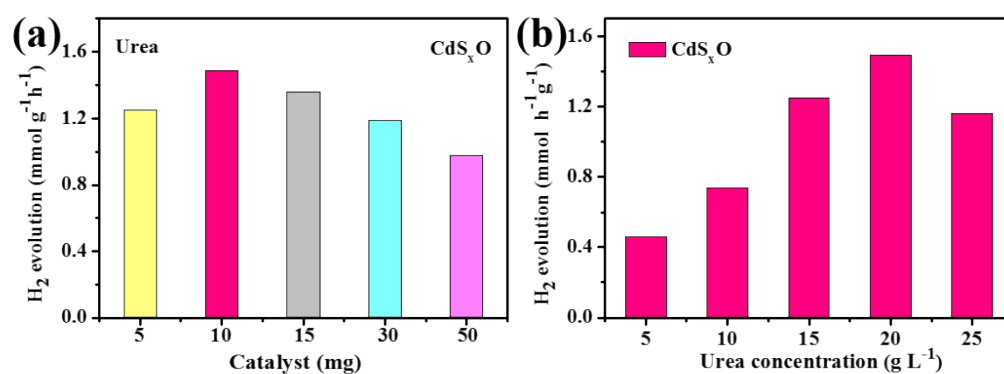

**Fig. S14** Comparisons of H<sub>2</sub>-evolution activities for CdS<sub>x</sub>O catalysts with (a) different use dosages and (b) different urea-concentration solutions for optimum photocatalytic conditions.

Based on the photocatalytic performance maximum, the dosages of catalyst and urea were pre-optimized at 0.1 g L<sup>-1</sup> and 20 g L<sup>-1</sup>, respectively.

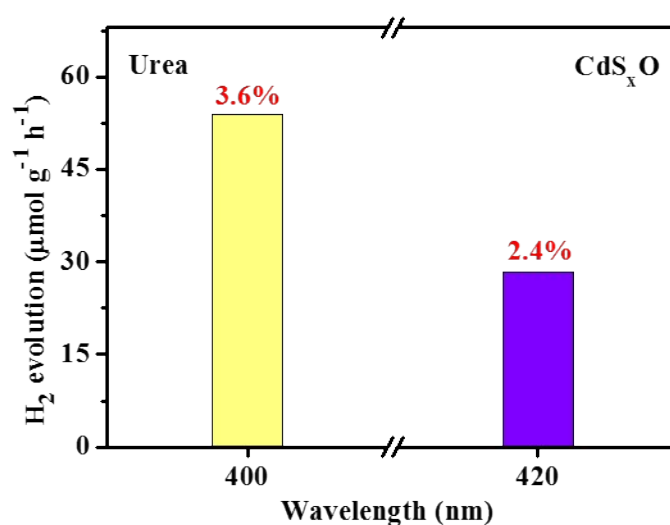

**Fig. S15** H<sub>2</sub>-evolution rates and AQYs over CdS<sub>x</sub>O under the monochromatic light irradiations of 400 and 420 nm, respectively.

The AQYs for the optimum H<sub>2</sub> evolution over CdS<sub>x</sub>O coupled with UOR reaches 3.6% at 400 nm and 2.4% at 420 nm without an external electron supply, which is an order of magnitude higher than general efficiency (0.5–1%) reported to date (Supplementary Table 2)<sup>6-9</sup> and even comparable to activity levels with sacrificial agents<sup>10-12</sup>.

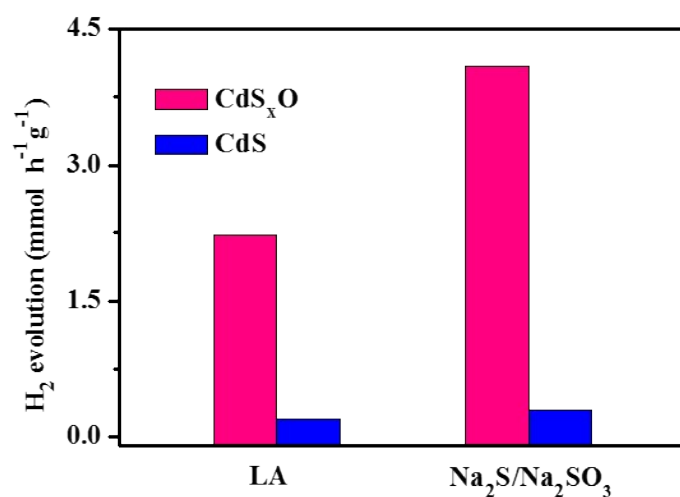

**Fig. S16.** Comparison of H<sub>2</sub> evolution activities for CdS<sub>x</sub>O catalysts with using Na<sub>2</sub>S/Na<sub>2</sub>SO<sub>3</sub> and LA as hole sacrificial agents.

When with using Na<sub>2</sub>S/Na<sub>2</sub>SO<sub>3</sub> or lactic acid (LA) as hole sacrificial agents, the pure CdS only displays a little bit of activity, whereas the CdS<sub>x</sub>O renders an outstanding activity growth. This proves an important role of surface sulfurous groups in modulating charge transfer and separation, which especially cannot be imitated by dissociative sulfurous ions in Na<sub>2</sub>S/Na<sub>2</sub>SO<sub>3</sub> solution.

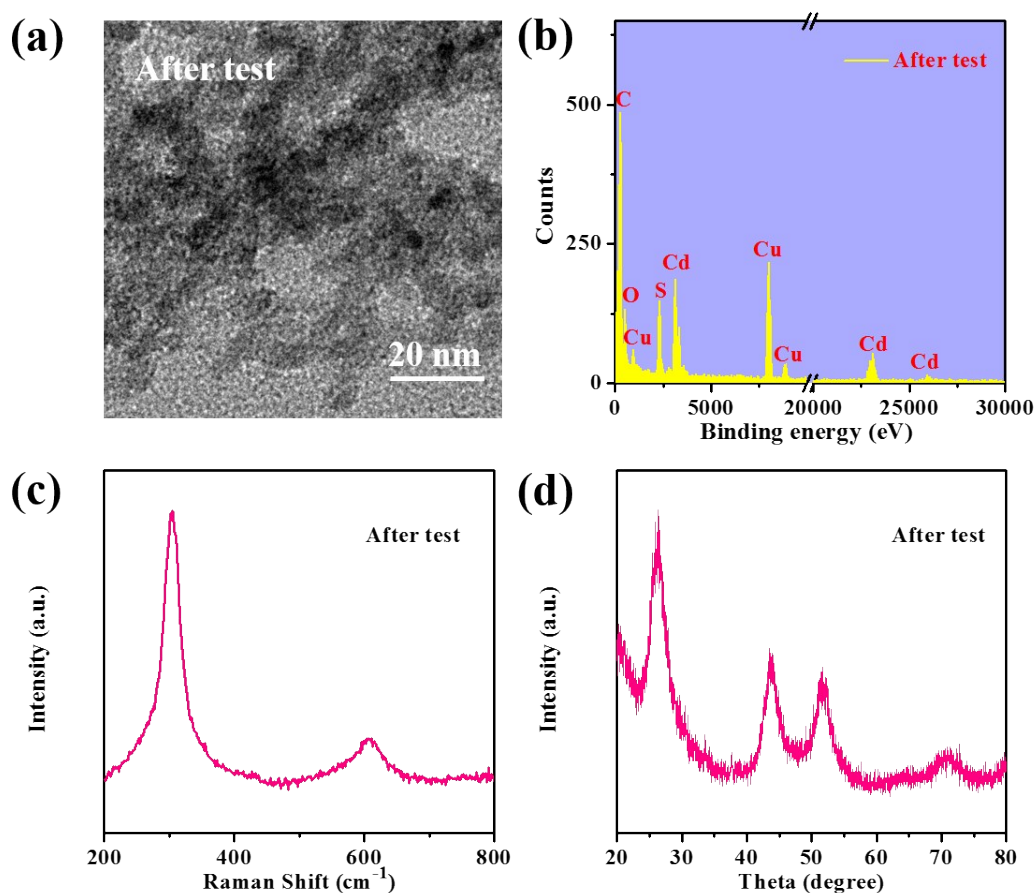

**Fig. S17** (a) TEM image, (b) EDX spectrum, (c) Raman spectrum and (d) XRD pattern of CdS<sub>x</sub>O catalyst after stability testing.

The microstructure characterizations for CdS<sub>x</sub>O catalyst after stability testing together show no noticeable change compared with those before use, confirming the excellent stability of CdS<sub>x</sub>O catalyst during photocatalytic process.

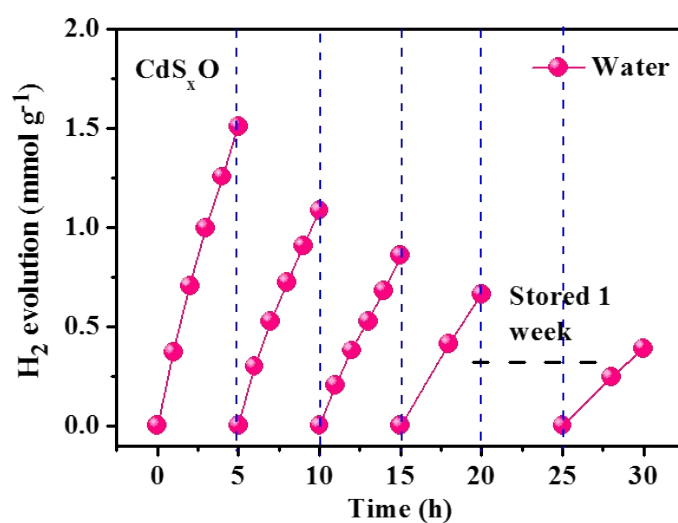

**Fig. S18** H<sub>2</sub>-evolution stability in cycling runs for CdS<sub>x</sub>O catalyst in pure water without any sacrifice agents.

The activity decay is observed for cycling H<sub>2</sub> evolution over CdS<sub>x</sub>O in pure water without urea, implying the disassembly of sulfurous groups under hole accumulation. By contrast, the introduction of amiable UOR can make surface sulfurous groups from self-harm collector to self-healing mediator with hole transfer acceleration.

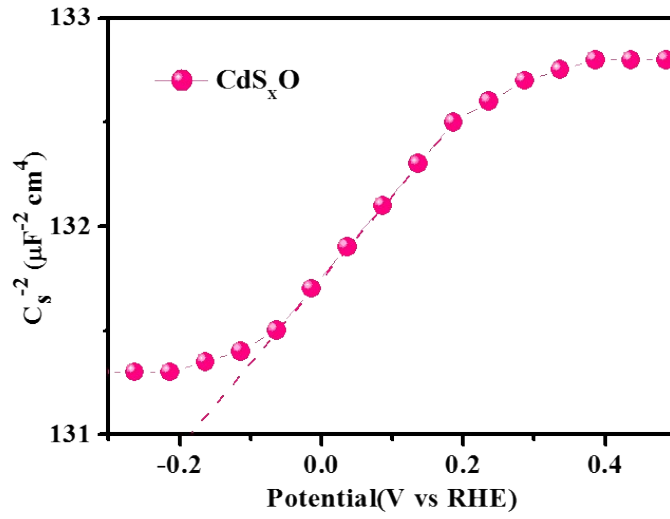

**Fig. S19** Mott-Schottky plot for CdS<sub>x</sub>O sample in dark.

The capacitance measurement at solid-liquid interface was employed to estimate the flatband potential ( $E_{fb}$ ) using Mott-Schottky plots with  $1/C_{sc}^2$  versus potential at a fixed frequency of 100 kHz in dark. The  $E_{fb}$  can be obtained by the Mott-Schottky plots based on the following equation:

$$1/C_{sc}^2 = 2(E_a - E_{fb} - \kappa T / e) / (eN\varepsilon_0\varepsilon_s A^2) \quad (\text{S4})$$

where  $C_{sc}$  is the space charge capacity,  $E_a$  is the applied potential,  $E_{fb}$  is the flat band potential and can be determined by extrapolation to a capacitance of zero,  $\kappa$  is the Boltzmann constant,  $T$  is the absolute temperature,  $e$  is the electron charge,  $N$  is the carrier density,  $\varepsilon_s$  is the dielectric constant of materials,  $\varepsilon_0$  is the electric permittivity of free space, and  $A$  is the area of electrode.  $E_{fb}$  can be determined at ca. -0.18 V vs. RHE by extrapolation to a capacitance of zero. The bandgap of CdS<sub>x</sub>O is estimated to be about 2.4 eV using UV-vis absorption spectrum in Supplementary Fig. 10.

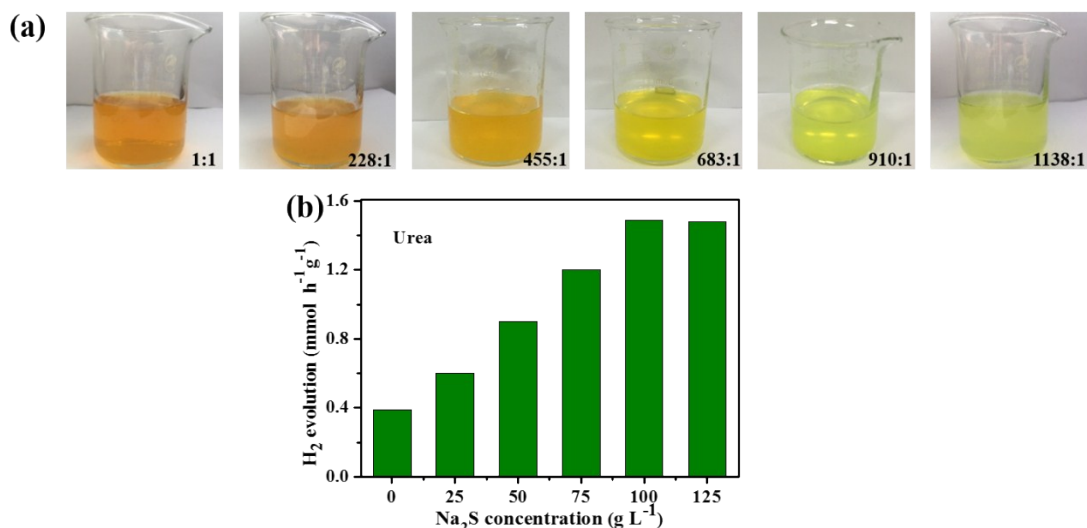

**Fig. S20** (a) Digital photographs of CdS<sub>x</sub>O product solutions with different ratio of S to Cd ion sources. (b) Photocatalytic H<sub>2</sub> evolution activities for above different CdS<sub>x</sub>O products as catalysts in urea solution under simulated 1 sun irradiation.

As the ratio of S to Cd ions in synthetic precursor solutions increases, the product solutions appear different colors varying from reddish brown to yellow green. Based on the photocatalytic performance maximum, the optimum CdS<sub>x</sub>O catalyst was selected with the ratio of S to Cd ions at 910 : 1, and the corresponding resultant solution is bright yellow in color.



**Table S2.** Comparison of various superior photocatalysts recently reported in the literatures for solar H<sub>2</sub> evolution with/without sacrificial agents.

| Photocatalyst                                                                        | Incident light | Sacrificial agent | H <sub>2</sub> evolution (μmol g <sup>-1</sup> h <sup>-1</sup> ) | H <sub>2</sub> quantum yield (%) | Reference        |
|--------------------------------------------------------------------------------------|----------------|-------------------|------------------------------------------------------------------|----------------------------------|------------------|
| CoO                                                                                  | λ>420 nm       | No                | 4.43                                                             | /                                | 6                |
| BP-BiVO <sub>4</sub>                                                                 | λ>420 nm       | No                | 160                                                              | 0.89% at 420 nm                  | 7                |
| Rh/Cr <sub>2</sub> O <sub>3</sub> -Ta <sub>3</sub> N <sub>5</sub> /KTaO <sub>3</sub> | AM 1.5         | No                | 40                                                               | 0.22% at 420 nm                  | 8                |
| 3D g-C <sub>3</sub> N <sub>4</sub> NS                                                | λ>420 nm       | No                | 101.4                                                            | 1.4% at 420 nm                   | 9                |
| <b>CdS<sub>x</sub>O</b>                                                              | <b>AM 1.5</b>  | <b>No</b>         | <b>1490</b>                                                      | <b>2.4% at 420 nm</b>            | <b>This work</b> |
| Few-layer C <sub>3</sub> N <sub>4</sub>                                              | λ>420 nm       | Triethanolamine   | 7990                                                             | 9.8% at 420 nm                   | 10               |
| GM@hm-C(CN) <sub>3</sub>                                                             | AM 1.5         | Triethanolamine   | 1009                                                             | 1.03%                            | 11               |
| 2DPA-NiO                                                                             | AM 1.5         | Methanol          | 10080.46                                                         | 5.4% at 420 nm                   | 12               |

## References

- 1 G. Hodes, I. Howell and L. Peter, *J. Electrochem. Soc.*, 1992, **139**, 3136.
- 2 X. Zhao, W. Luo, J. Feng, M. Li, Z. Li, T. Yu and Z. Zou, *Adv. Energy Mater.*, 2014, **4**, 1301785.
- 3 J. M. Catherine, *J. Cluster Sci.*, 1996, **7**, 341.
- 4 Z. Sun, H. Zheng, J. Li and P. Du, *Energy Environ. Sci.*, 2015, **8**, 2668.
- 5 U. Holzwarth and N. Gibson, *Nat. Nanotech.*, 2011, **6**, 534.
- 6 J. Xu, X. Li, Z. Ju, Y. Sun, X. Jiao, J. Wu, C. Wang, W. Yan, H. Ju, J. Zhu and Y. Xie, *Angew. Chem. Int. Ed.*, 2019, **131**, 3064.
- 7 M. Zhu, Z. Sun, M. Fujitsuka and T. Majima, *Angew. Chem. Int. Ed.*, 2018, **57**, 2160.
- 8 Z. Wang, Y. Inoue, T. Hisatomi, R. Ishikawa, Q. Wang, T. Takata, S. Chen, N. Shibata, Y. Ikuhara and K. Domen, *Nat. Catal.*, 2018, **1**, 756.
- 9 X. Chen, R. Shi, Q. Chen, Z. Zhang, W. Jiang, Y. Zhu and T.R. Zhang, *Nano Energy*, 2019, **59**, 644.
- 10 Y. Xiao, G. Tian, W. Li, Y. Xie, B. Jiang, C. Tian, D. Zhao and H. Fu, *J. Am. Chem. Soc.*, 2019, **141**, 2508.
- 11 G. Zhou, Y. Shan, Y. Hu, X. Xu, L. Long, J. Zhang, J. Dai, J. Guo, J. Shen, S. Li, L. Liu and X. Wu, *Nat. Comm.*, 2018, **9**, 3366.
- 12 Z. Lin, C. Du, B. Yan, C. Wang and G. Yang, *Nat. Comm.*, 2018, **9**, 4036.
